# Supplementary material for: Comparative Genomic Analysis of a Novel Vibrio sp. Isolated from an Ulcer Disease Event in Atlantic Salmon (Salmo salar)
Source: MDPI journal article supplement (doi:10.3390/microorganisms11071736), 2023-07-02
Supplement: s1 [file s1]

**Table S1.** Enzymatic profile of *Vibrio*. sp. J383 using commercial biochemical test kits (API system).

| APIZYM                          |   | API20E                      |   | API20NE                           |   |
|---------------------------------|---|-----------------------------|---|-----------------------------------|---|
| Alkaline phosphatase            | + | β-Galactosidase             | + | Reduction of nitrates to nitrites | + |
| Esterase (C4)                   | + | L-Arginine                  | - | Indole production                 | + |
| Esterase lipase (C8)            | + | L-Lysine                    | - | Glucose fermentation              | + |
| Lipase                          | + | L-Ornithine                 | - | Arginine                          | - |
| Leucine arylamidase             | + | Citrate utilization         | - | Urease                            | - |
| Valine arylamidase              | + | H <sub>2</sub> S production | - | Esculin                           | + |
| Cystine arylamidase             | + | Urease                      | - | Gelatin                           | + |
| Trypsin                         | + | L-Tryptophane               | + | β-galactosidase                   | + |
| Chymotrypsin                    | + | Indole production           | + | D-Glucose                         | + |
| Acid phosphatase                | + | Acetoin production          | - | L-Arabinose                       | - |
| Naphthol-AS-BI-phosphohydrolase | + | Gelatinase                  | + | D-Mannose                         | - |
| Galactosidase                   | + | D-Glucose                   | + | D-mannitol                        | + |
| B- galactosidase                | - | D-Mannitol                  | + | N-acetyl-glucosamine              | - |
| Glucuronidase                   | - | Inositol                    | - | D-maltose                         | - |
| B-glucuronidase                 | - | D-Sorbitol                  | - | Potassium Gluconate               | - |
| Glucosidase                     | - | L-Rhamnose                  | - | Capric acid                       | - |
| B-glucosidase                   | - | D-Saccharose                | - | Adipic acid                       | - |
| N-acetyl-B-glycosaminidase      | - | D-Melibiose                 | - | Malic acid                        | - |
| Mannosidase                     | - | D-Amygdaline                | + | Trisodium citrate                 | - |
| Fucosidase                      | - | L-Arabinose                 | - | Phenylacetic acid                 | - |

**Table S2.** Genes associated with subsystems in chromosomes and plasmid

| Predicted genes associated with subsystems pathogenesis and environmental adaptations |                                                    |                 |         |
|---------------------------------------------------------------------------------------|----------------------------------------------------|-----------------|---------|
| Gene Subsystem Category<br>or Gene Name                                               | Presence/Absence of Gene in <i>Vibrio</i> sp. J383 |                 |         |
|                                                                                       | Chromosome<br>1                                    | Chromosome<br>2 | Plasmid |
| MazEF toxin-antitoxing                                                                |                                                    |                 | +       |
| Flagellum                                                                             | +                                                  |                 |         |
| Fatty acid biosynthesis                                                               | +                                                  |                 |         |
| Ferrichrome-iron receptor                                                             | +                                                  |                 |         |
| <i>fur</i>                                                                            | +                                                  |                 |         |
| <i>mdtL</i>                                                                           |                                                    | +               |         |
| <i>fabG</i>                                                                           | +                                                  |                 |         |
| <i>Vibrio</i> Ferrin synthesis                                                        | +                                                  |                 |         |
| Lipoic acid metabolism                                                                | +                                                  | +               |         |
| Polyamine metabolism                                                                  | +                                                  | +               |         |
| Cold shock protein of CSP family                                                      |                                                    | +               |         |
| Lactose utilization                                                                   |                                                    | +               |         |
| DNA repair, bacterial photolyase                                                      | +                                                  | +               |         |
| Cell division cluster                                                                 | +                                                  |                 |         |
| Antibiotic targets in DNA processing                                                  | +                                                  |                 |         |
| Resistance to chromium compounds                                                      | +                                                  |                 |         |
| Xanthine dehydrogenase subunit                                                        |                                                    | +               |         |
| Thiamin, thiazole, hydroxyethyl<br>pyrimidine uptake                                  |                                                    | +               |         |
| Bacterial checkpoint control related<br>cluster                                       | +                                                  |                 |         |
| Proteasome bacterial                                                                  | +                                                  |                 |         |
| Chemotaxis                                                                            | +                                                  |                 |         |
| Antibiotic targets in cell wall<br>biosynthesis                                       | +                                                  | +               |         |
| Heme transport                                                                        |                                                    | +               |         |
| Iron ABC transport permease                                                           |                                                    | +               |         |
| Toxin antitoxin system                                                                |                                                    | +               |         |
| Antibiotic target in transcription                                                    | +                                                  |                 |         |
