# Supplementary material for: Comparative Genomic Analysis of a Novel Vibrio sp. Isolated from an Ulcer Disease Event in Atlantic Salmon (Salmo salar)
Source: MDPI journal article supplement (doi:10.3390/microorganisms11071736), 2023-07-02
Supplement: s1 [file s1]

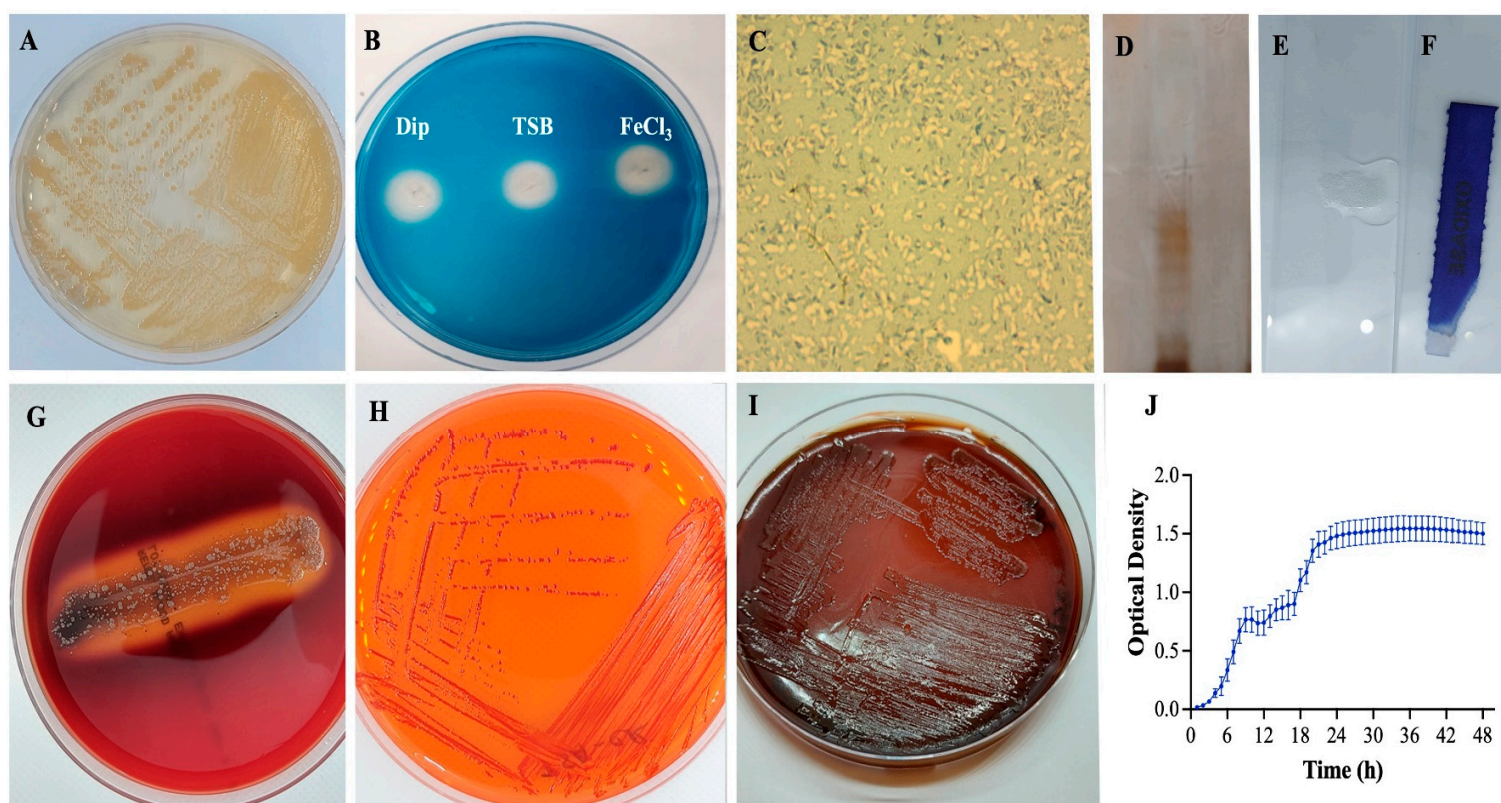

**Figure S1.** Phenotypic characteristics of *Vibrio* sp. J383. **(A)** Growth on TSA with 2% NaCl. **(B)** Siderophore synthesis on chrome azurol S (CAS) agar plates from *Vibrio* sp. J383 grown under iron-enriched conditions (TSB supplemented with 100  $\mu$ m of FeCl<sub>3</sub>), standard culture conditions (TSB), and iron limited conditions (TSB supplemented with 100  $\mu$ m of 2,2-dipyridil) at 15°C. Yellow reaction around *Vibrio* sp. J383 colony indicative of being positive for siderophore synthesis. **(C)** Capsule stain of *Vibrio* sp. J383. **(D)** LPS profile for *Vibrio* sp. J383. **(E)** Positive catalase test. **(F)** Positive Oxidase test. **(G)** B hemolysin production in sheep blood agar. **(H)** Growth on congo red agar. **(I)** Growth on salmon blood agar and B hemolysin production. **(J)** Growth in TSB with 2% NaCl at 15°C. Culture was aerated with aeration (180 rpm) and grown in a 12 well plate for 48 h.

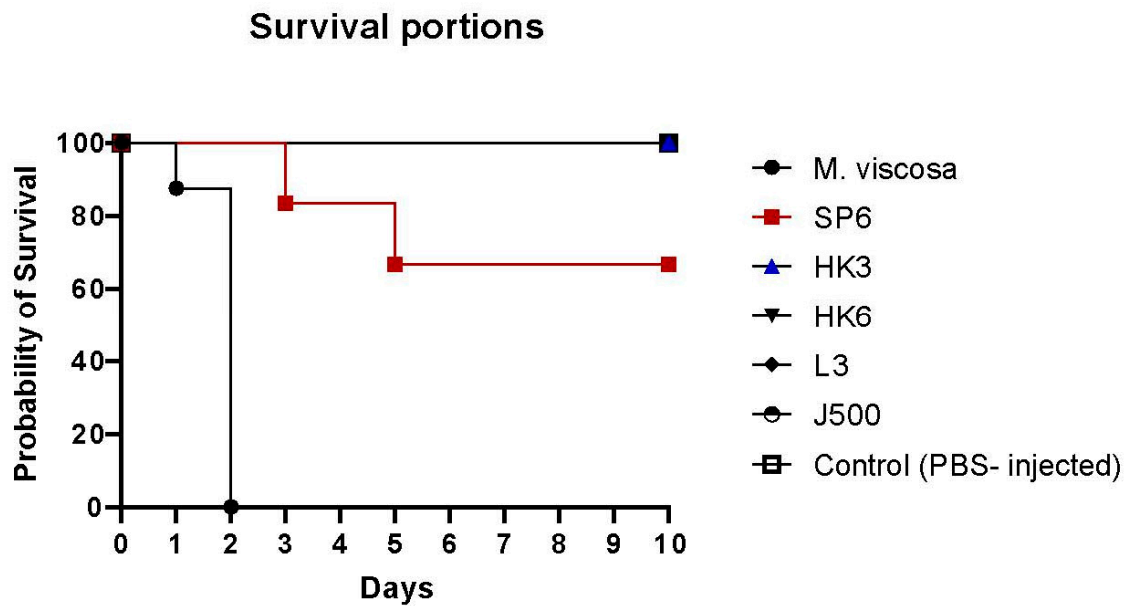

**Figure S2.** Acute mortality of Atlantic salmon infected with different bacterial strains isolated from fish exhibiting ‘winter ulcer’-like clinical signs. *Moritella viscosa* J311 was obtained from American Type Culture Collection, NHI. The animals were injected with 100 ul of pathogen ( $10^8$  CFU / dose) or PBS.”

**A**

|                                         |    | 1     | 2     | 3     | 4     | 5       | 6     | 7     | 8     | 9     | 10    | 11    | 12    | 13    | 14    | 15    | 16    | 17    | 18    | 19    | 20    |
|-----------------------------------------|----|-------|-------|-------|-------|---------|-------|-------|-------|-------|-------|-------|-------|-------|-------|-------|-------|-------|-------|-------|-------|
| Vibrio harveyi 345                      | 1  |       | 83.58 | 83.53 | 83.61 | 83.28   | 84.80 | 84.41 | 83.86 | 0.00  | 83.48 | 86.26 | 84.12 | 83.95 | 83.98 | 84.40 | 0.00  | 83.47 | 85.79 | 90.08 | 84.57 |
| Vibrio spp. J383 Chromosome_1           | 2  | 10.75 |       | 83.01 | 95.75 | 82.91   | 83.67 | 83.96 | 83.83 | 0.00  | 83.03 | 83.58 | 83.70 | 83.65 | 83.88 | 83.98 | 0.00  | 83.58 | 83.54 | 83.71 | 83.84 |
| Vibrio cholerae O1 str                  | 3  | 5.11  | 3.35  |       | 82.98 | 82.21   | 83.53 | 84.06 | 84.37 | 84.39 | 99.97 | 83.29 | 83.96 | 83.65 | 83.77 | 84.05 | 0.00  | 95.50 | 83.37 | 83.59 | 83.45 |
| Vibrio splendidus BST398                | 4  | 10.90 | 86.53 | 3.54  |       | 82.87   | 83.86 | 83.98 | 83.85 | 0.00  | 82.99 | 83.61 | 83.58 | 83.47 | 83.84 | 84.02 | 0.00  | 83.07 | 83.50 | 83.76 | 83.84 |
| Photobacterium damsela subsp. piscicida | 5  | 2.95  | 2.47  | 1.83  | 2.53  |         | 83.11 | 82.71 | 82.64 | 0.00  | 82.21 | 83.25 | 82.80 | 82.78 | 82.75 | 82.71 | 0.00  | 82.39 | 83.42 | 83.16 | 82.96 |
| Vibrio vulnificus FORC-077              | 6  | 13.78 | 7.63  | 8.05  | 7.46  | 2.74    |       | 84.29 | 84.08 | 0.00  | 83.51 | 84.48 | 84.66 | 84.39 | 84.11 | 84.29 | 0.00  | 83.54 | 85.14 | 84.77 | 95.77 |
| Vibrio anguillarum J360                 | 7  | 5.87  | 4.74  | 8.68  | 4.78  | 2.01    | 7.17  |       | 98.55 | 0.00  | 84.12 | 84.00 | 98.56 | 98.51 | 98.48 | 99.99 | 0.00  | 84.07 | 84.10 | 84.08 | 84.20 |
| Vibrio anguillarum MHK3                 | 8  | 5.88  | 4.90  | 9.74  | 4.90  | 2.15    | 7.31  | 84.23 |       | 0.00  | 84.54 | 83.82 | 98.79 | 98.75 | 98.61 | 98.56 | 0.00  | 84.76 | 83.96 | 83.90 | 83.98 |
| Vibrio vulnificus FDAARGOS-119          | 9  | 0.19  | 0.11  | 1.13  | 0.13  | 0.02    | 0.09  | 0.60  | 0.44  |       | 84.39 | 0.00  | 0.00  | 0.00  | 0.00  | 0.00  | 81.70 | 0.00  | 0.00  | 0.00  | 0.00  |
| Vibrio cholerae FDAARGOS-223            | 10 | 5.21  | 3.39  | 97.57 | 3.59  | 1.85    | 8.27  | 8.87  | 9.97  | 1.14  |       | 83.28 | 83.97 | 83.83 | 83.96 | 84.10 | 0.00  | 95.49 | 83.33 | 83.58 | 83.42 |
| Vibrio alginolyticus 2439-01            | 11 | 41.47 | 9.97  | 5.53  | 10.03 | 3.01    | 13.94 | 5.71  | 6.31  | 0.28  | 5.63  |       | 84.03 | 83.98 | 83.96 | 83.98 | 0.00  | 83.45 | 86.68 | 86.43 | 84.49 |
| Vibrio anguillarum CENVA NB11008        | 12 | 5.68  | 4.69  | 8.93  | 4.88  | 2.00    | 7.61  | 82.67 | 88.59 | 0.48  | 9.03  | 5.75  |       | 98.76 | 98.58 | 98.55 | 0.00  | 84.47 | 84.72 | 84.04 | 84.44 |
| Vibrio anguillarum 775                  | 13 | 5.69  | 4.61  | 8.36  | 4.86  | 1.98    | 7.44  | 82.07 | 87.82 | 0.37  | 8.57  | 5.93  | 86.46 |       | 98.52 | 98.54 | 0.00  | 83.83 | 84.79 | 84.00 | 83.79 |
| Vibrio anguillarum JLL 237              | 14 | 5.47  | 4.62  | 8.34  | 4.72  | 2.00    | 6.95  | 82.41 | 87.50 | 0.66  | 8.70  | 5.86  | 84.93 | 87.27 |       | 98.49 | 0.00  | 84.11 | 84.16 | 83.90 | 84.16 |
| Vibrio anguillarum VIB43                | 15 | 5.95  | 4.83  | 8.67  | 4.84  | 2.00    | 7.26  | 94.54 | 85.19 | 0.61  | 8.89  | 5.78  | 83.46 | 82.87 | 83.49 |       | 0.00  | 84.36 | 84.20 | 84.10 | 84.20 |
| Vibrio fluvialis ATCC 33809             | 16 | 0.19  | 0.16  | 0.24  | 0.10  | 2.74E-4 | 0.46  | 0.12  | 0.76  | 1.69  | 0.24  | 0.09  | 0.27  | 0.24  | 0.13  | 0.13  |       | 0.00  | 0.00  | 0.00  | 0.00  |
| Vibrio cholerae RFB05                   | 17 | 4.98  | 3.32  | 83.05 | 3.37  | 1.65    | 8.12  | 8.50  | 9.97  | 0.90  | 84.51 | 5.16  | 9.19  | 8.70  | 9.00  | 8.95  | 0.57  |       | 84.26 | 83.51 | 83.48 |
| Vibrio parahaemolyticus R14             | 18 | 43.81 | 10.16 | 5.82  | 10.45 | 3.04    | 16.04 | 5.74  | 6.20  | 0.31  | 5.93  | 55.78 | 6.69  | 6.90  | 6.16  | 5.88  | 0.22  | 6.32  |       | 85.75 | 84.62 |
| Vibrio campbellii ATCC 25920, CAIM 519T | 19 | 70.90 | 11.92 | 5.32  | 12.09 | 3.16    | 14.63 | 5.73  | 6.07  | 0.30  | 5.42  | 43.52 | 5.68  | 5.80  | 5.88  | 5.77  | 0.24  | 5.38  | 45.74 |       | 84.71 |
| Vibrio vulnificus Env1                  | 20 | 13.73 | 7.27  | 7.48  | 7.48  | 2.78    | 87.16 | 7.04  | 7.17  | 0.09  | 7.64  | 13.55 | 7.21  | 7.03  | 6.73  | 7.12  | 0.22  | 7.42  | 15.11 | 14.56 |       |

**B**

|                                         |    | 1       | 2       | 3     | 4       | 5       | 6       | 7       | 8     | 9     | 10    | 11     | 12    | 13    | 14    | 15    | 16     | 17    | 18    | 19    | 20    |
|-----------------------------------------|----|---------|---------|-------|---------|---------|---------|---------|-------|-------|-------|--------|-------|-------|-------|-------|--------|-------|-------|-------|-------|
| Vibrio vulnificus FDAARGOS-119          | 1  |         | 84.31   | 0.00  | 0.00    | 0.00    | 0.00    | 0.00    | 0.00  | 0.00  | 0.00  | 0.00   | 0.00  | 0.00  | 0.00  | 0.00  | 0.00   | 0.00  | 0.00  | 0.00  | 0.00  |
| Vibrio fluvialis ATCC 33809             | 2  | 9.36    |         | 0.00  | 0.00    | 0.00    | 0.00    | 0.00    | 0.00  | 0.00  | 0.00  | 0.00   | 0.00  | 0.00  | 0.00  | 0.00  | 0.00   | 0.00  | 0.00  | 0.00  | 0.00  |
| Vibrio harveyi 345                      | 3  | 0.10    | 0.10    |       | 82.74   | 0.00    | 83.11   | 0.00    | 86.38 | 0.00  | 0.00  | 0.00   | 87.11 | 0.00  | 0.00  | 0.00  | 0.00   | 0.00  | 85.15 | 88.38 | 85.88 |
| Vibrio spp. J383 Chromosome_2           | 4  | 0.08    | 0.05    | 2.69  |         | 0.00    | 93.31   | 0.00    | 84.15 | 0.00  | 0.00  | 0.00   | 83.36 | 0.00  | 0.00  | 0.00  | 0.00   | 0.00  | 83.58 | 84.07 | 84.11 |
| Vibrio cholerae O1 str                  | 5  | 0.63    | 0.20    | 0.10  | 0.15    |         | 0.00    | 0.00    | 0.00  | 85.15 | 85.08 | 100.00 | 0.00  | 85.60 | 85.23 | 85.46 | 85.15  | 94.10 | 0.00  | 0.00  | 0.00  |
| Vibrio splendidus BST398                | 6  | 0.17    | 0.13    | 2.58  | 76.36   | 0.19    |         | 0.00    | 84.67 | 0.00  | 0.00  | 0.00   | 83.71 | 0.00  | 0.00  | 0.00  | 0.00   | 0.00  | 84.19 | 83.82 | 84.52 |
| Photobacterium damsela subsp. piscicida | 7  | 6.29E-5 | 3.16E-4 | 0.07  | 2.15E-4 | 6.37E-3 | 2.90E-4 |         | 0.00  | 0.00  | 0.00  | 0.00   | 0.00  | 0.00  | 0.00  | 0.00  | 0.00   | 0.00  | 0.00  | 0.00  | 0.00  |
| Vibrio vulnificus FORC-077              | 8  | 0.05    | 0.32    | 5.44  | 1.14    | 0.85    | 1.14    | 1.50E-4 |       | 0.00  | 0.00  | 0.00   | 85.35 | 0.00  | 0.00  | 0.00  | 0.00   | 82.55 | 86.09 | 84.92 | 94.80 |
| Vibrio anguillarum J360                 | 9  | 0.24    | 0.11    | 0.03  | 0.02    | 2.23    | 0.08    | 8.11E-4 | 0.31  |       | 98.54 | 85.16  | 0.00  | 98.41 | 98.40 | 98.35 | 100.00 | 82.15 | 0.00  | 0.00  | 0.00  |
| Vibrio anguillarum MHK3                 | 10 | 0.29    | 0.06    | 0.01  | 0.10    | 2.82    | 0.09    | 9.25E-5 | 0.38  | 71.56 |       | 85.21  | 0.00  | 98.64 | 98.49 | 98.40 | 98.54  | 83.76 | 0.00  | 0.00  | 0.00  |
| Vibrio cholerae FDAARGOS-223            | 11 | 0.62    | 0.19    | 0.10  | 0.15    | 98.21   | 0.19    | 6.30E-3 | 0.84  | 2.21  | 2.82  |        | 0.00  | 86.00 | 85.24 | 85.47 | 85.17  | 94.10 | 0.00  | 0.00  | 0.00  |
| Vibrio alginolyticus 2439-01            | 12 | 0.04    | 0.15    | 20.60 | 2.40    | 0.18    | 2.08    | 0.08    | 2.47  | 0.16  | 0.17  | 0.18   |       | 0.00  | 0.00  | 0.00  | 0.00   | 85.43 | 88.47 | 86.62 | 85.11 |
| Vibrio anguillarum CNEVA NB11008        | 13 | 0.32    | 0.07    | 0.03  | 0.02    | 2.70    | 8.99E-3 | 9.19E-5 | 0.39  | 74.32 | 77.04 | 2.87   | 0.09  |       | 98.47 | 98.41 | 98.40  | 83.84 | 0.00  | 0.00  | 0.00  |
| Vibrio anguillarum 775                  | 14 | 0.20    | 0.07    | 0.02  | 0.03    | 2.74    | 0.10    | 0.00    | 0.37  | 75.48 | 80.48 | 2.71   | 0.18  | 80.26 |       | 98.38 | 98.39  | 83.42 | 0.00  | 0.00  | 0.00  |
| Vibrio anguillarum JLL 237              | 15 | 0.44    | 0.06    | 0.01  | 0.09    | 2.73    | 0.09    | 9.04E-5 | 0.24  | 74.29 | 73.17 | 2.70   | 0.19  | 75.93 | 77.28 |       | 98.35  | 84.60 | 0.00  | 0.00  | 0.00  |
| Vibrio anguillarum VIB43                | 16 | 0.28    | 0.11    | 0.03  | 0.02    | 2.25    | 0.08    | 8.17E-4 | 0.31  | 90.96 | 72.19 | 2.22   | 0.16  | 74.85 | 76.00 | 74.82 |        | 82.15 | 0.00  | 0.00  | 0.00  |
| Vibrio cholerae RFB05                   | 17 | 0.46    | 0.24    | 0.63  | 0.07    | 70.70   | 0.08    | 5.89E-3 | 1.62  | 1.62  | 2.14  | 69.90  | 1.01  | 2.19  | 2.22  | 2.24  | 1.63   |       | 83.49 | 0.00  | 81.87 |
| Vibrio parahaemolyticus R14             | 18 | 0.09    | 0.25    | 19.34 | 1.95    | 0.17    | 1.83    | 0.08    | 4.20  | 0.18  | 0.32  | 0.16   | 42.46 | 0.09  | 0.18  | 0.09  | 0.18   | 1.32  |       | 84.24 | 85.98 |
| Vibrio campbellii ATCC 25920, CAIM 519T | 19 | 0.17    | 0.16    | 50.29 | 3.63    | 0.60    | 2.24    | 0.08    | 3.38  | 0.09  | 0.18  | 0.59   | 20.77 | 0.18  | 0.10  | 0.09  | 0.09   | 0.52  | 17.20 |       | 85.22 |
| Vibrio vulnificus Env1                  | 20 | 0.05    | 0.23    | 4.26  | 1.15    | 0.89    | 1.18    | 7.66E-5 | 86.10 | 0.27  | 0.35  | 0.87   | 2.44  | 0.35  | 0.30  | 0.35  | 0.27   | 1.04  | 4.14  | 2.86  |       |

**Figure S3.** Average nucleotide identity in *Vibrio* sp. J383. **(A)** chromosome 1; **(B)** chromosome 2. *Vibrio* sp. J383 identity percentage parameters for annotated genes were set up as minimum similarity of 0.8 and minimum length of 0.8. Analyses were performed using CLC Genomic Workbench v20 (CLC Bio). Genome alignment involved 20 *Vibrio* sp.
